# Supplementary material
Source: PubMed Central journal article supplement (PMC5710399)
Supplement: jamaophthalmol-135-1221-s001.pdf [file jamaophthalmol-135-1221-s001.pdf]

## Supplementary Online Content

Berry JL, Xu L, Murphree AL, et al. Potential of aqueous humor as a surrogate tumor biopsy for retinoblastoma. *JAMA Ophthalmol*. Published online October 12, 2017. doi:10.1001/jamaophthalmol.2017.4097

**eTable.** Concentration of Nucleic Acids in the Aqueous Humor

**eFigure.** *RB1* Mutation Isolated From cfDNA in the Aqueous Humor of Case 3 by Sanger Sequencing

This supplementary material has been provided by the authors to give readers additional information about their work.

| Sample Name      | Conc. DNA ng/ $\mu$ l | Conc. RNA ng/ $\mu$ l | Conc. miRNA ng/ $\mu$ l |
|------------------|-----------------------|-----------------------|-------------------------|
| Case 1           | 56                    | 12.8                  | 150                     |
| Case 2           | 31.1                  | 4.06                  | 150                     |
| Case 3 -sample 1 | 0.126                 | 0.4                   | 0.252                   |
| Case 3 -sample 2 | 0.084                 | 0.4                   | 0.079                   |
| Case 3 -sample 3 | 0.199                 | 0.776                 | 0.293                   |
| Case 3 -sample 4 | 0.148                 | 0.53                  | 0.176                   |

**eTable.** Concentration of Nucleic Acids in the Aqueous Humor

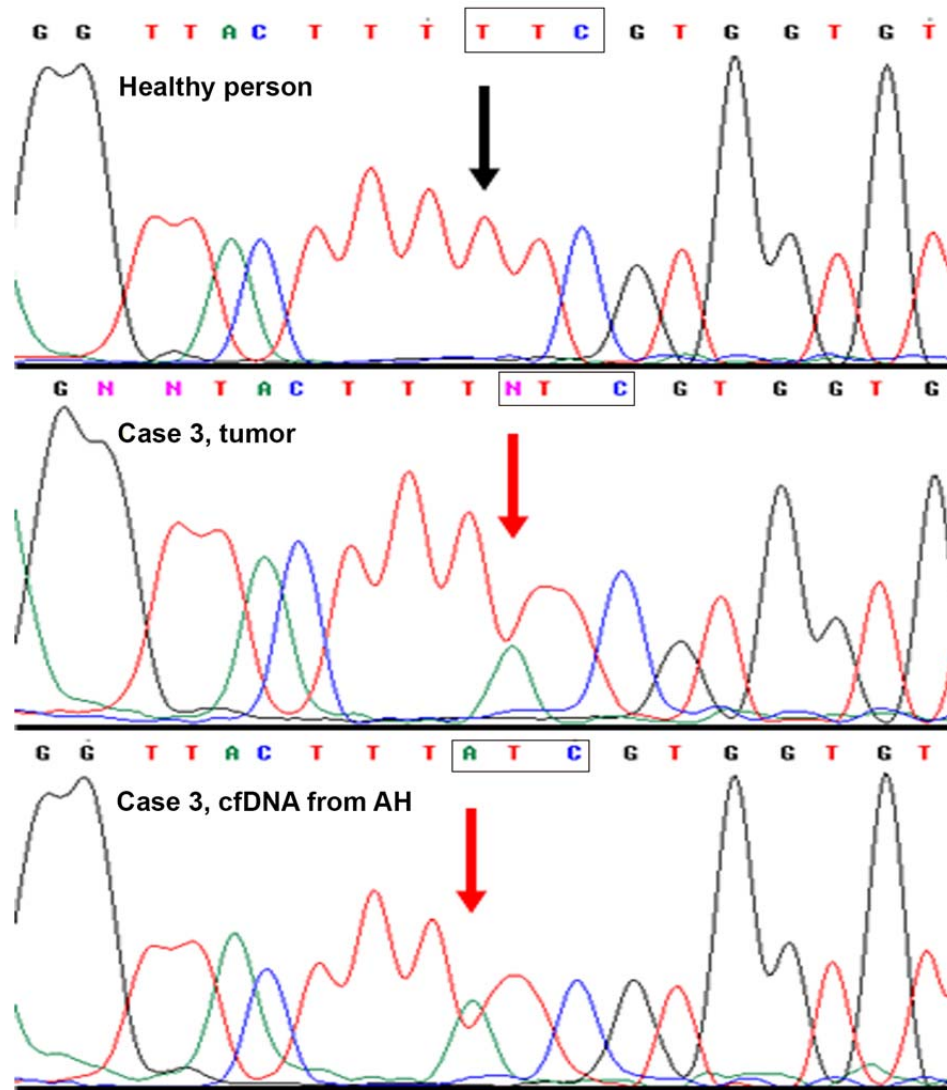

**eFigure.** *RB1* Mutation Isolated From cfDNA in the Aqueous Humor of Case 3 by Sanger Sequencing: A: Sample DNA without *RB1* mutation, B: *RB1* mutation in tumor sample, C: *RB1* mutation in cfDNA from sample 1 (AH 1).
